# Supplementary material for: A New Proposal for the Interpretation of the Diagonal Compression Test on Masonry Wallettes: The Identification of Young’s Modulus, Poisson’s Ratio, and Modulus of Rigidity
Source: MDPI journal article supplement (doi:10.3390/buildings14010104), 2023-12-31
Supplement: s1 [file s1]

**Table S1.** Explanation of the symbols used in Figure 1.

| Symbols                  | Meaning                                                                                                                                                                                                                                                                                                                                              |
|--------------------------|------------------------------------------------------------------------------------------------------------------------------------------------------------------------------------------------------------------------------------------------------------------------------------------------------------------------------------------------------|
| $P$                      | The compressive load applied along one of the diagonals of the masonry wallette (diagonal compression load).                                                                                                                                                                                                                                         |
| $\vartheta$              | The angle between the direction of $P$ and the horizontal mortar joints (bed joints).                                                                                                                                                                                                                                                                |
| $x$ and $y$              | The axes of the local reference frame of origin $A$ , parallel to the mortar joints ( $x$ is parallel to the horizontal mortar joints—or bed joints—and $y$ is parallel to the vertical mortar joints—or head joints).                                                                                                                               |
| $\sigma_x$               | The normal stress acting—in the direction of the $x$ -axis—on the planes of the infinitesimal neighborhood of $A$ that are perpendicular to the $x$ -axis.                                                                                                                                                                                           |
| $\sigma_y$               | The normal stress acting—in the direction of the $y$ -axis—on the planes of the infinitesimal neighborhood of $A$ that are perpendicular to the $y$ -axis.                                                                                                                                                                                           |
| $\tau_{xy}$ <sup>1</sup> | The shear stress—directed along the $y$ -axis—acting on the planes of the infinitesimal neighborhood of $A$ that are perpendicular to the $x$ -axis (the $x$ -index designates the unit normal vector to the coordinate plane on which the shear stress acts, the $y$ -index identifies the coordinate direction along which the shear stress acts). |

<sup>1</sup>  $\tau_{yx}$ , the shear stress—directed along the  $x$ -axis—acting on the planes of the infinitesimal neighborhood of  $A$  that are perpendicular to the  $y$ -axis, is equal to  $\tau_{xy}$ :  $\tau_{yx} = \tau_{xy}$ .
